# Supplementary figures and images for: Preparation and visible-light photocatalytic properties of the floating hollow glass microspheres – TiO2/Ag3PO4 composites
Source: Royal Society of Chemistry journal article supplement (doi:10.1039/c8ra08697d), 2019-01-01

Supporting information:

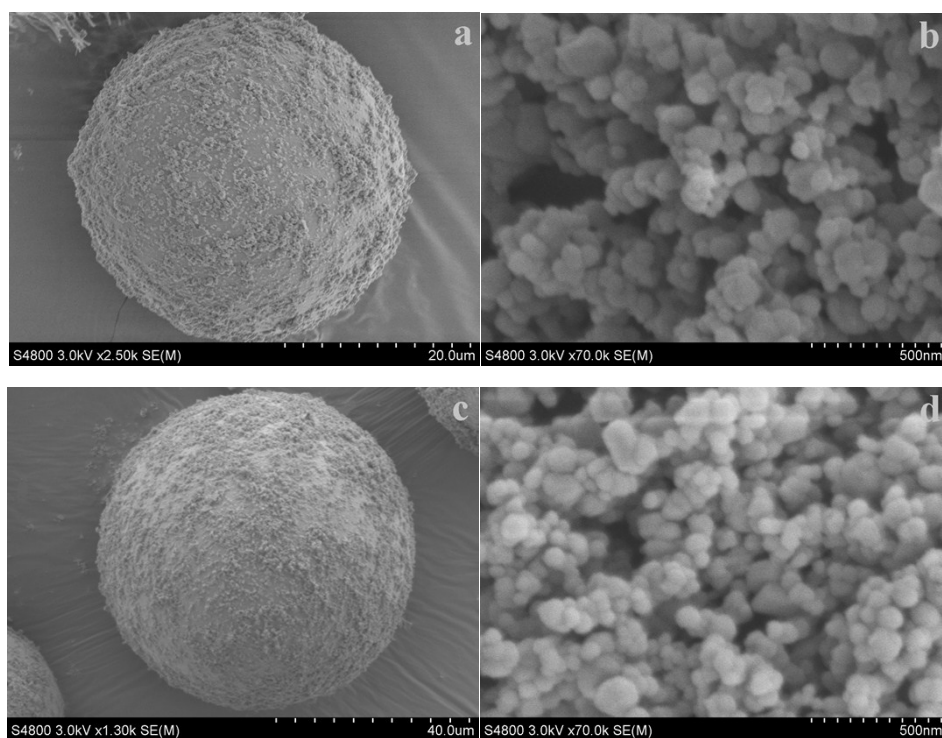

Figure S1. SEM images of HGMs-1:1 (a, b), HGMs-1:2 (c, d)

Supplement: c8ra08697d1.pdf [file c8ra08697d1.pdf]
